# Supplementary material
Source: PubMed Central journal article supplement (PMC4313874)
Supplement: NIHMS480647-supplement-1_si_001.pdf [file NIHMS480647-supplement-1_si_001.pdf]

# ***Inelastic X-Ray Scattering (IXS) of a Transition Metal Complex (FeCl<sub>4</sub>)<sup>-</sup> – A Vibrational Spectroscopy for All Normal Modes***

*Hongxin Wang*,<sup>‡</sup> *Weibing Dong*,<sup>&</sup> *†* *Marilyn M. Olmstead*,<sup>&</sup> *James C. Fettinger*,<sup>&</sup> *Jay Nix*,<sup>‡</sup> *Hiroshi Uchiyama*,<sup>¥</sup> *Satoshi Tsutsui*,<sup>¥</sup> *Alfred Q. R. Baron*,<sup>¥</sup> *§* and *Stephen P. Cramer* <sup>\*</sup>,<sup>&</sup>,<sup>‡</sup>.

<sup>&</sup>

*Department of Chemistry, University of California, Davis, CA 95616*

<sup>‡</sup>

*Physical Biosciences Division, Lawrence Berkeley National Laboratory, Berkeley, CA 94720*

<sup>¶</sup>

*Department of Biochemistry & Molecular Biology, Pennsylvania State University, University Park, PA 16802*

<sup>¥</sup>

*Research and Utilization Division, SPring-8/JASRI, 1-1-1 Kouto, Sayo, Hyogo 679-5198, JAPAN*

<sup>§</sup>

*Materials Dynamics Laboratory, RIKEN SPring-8 Center, 1-1-1 Kouto, Sayo, Hyogo 679-5148, JAPAN*

## Supporting Information

**Preparation of (NEt<sub>4</sub>)(FeCl<sub>4</sub>).** A stoichiometric quantity of NEt<sub>4</sub>Cl in 5mL of ethanol was added to a solution containing 5 mmol (0.81g) of FeCl<sub>3</sub> in 5mL of absolute ethanol. Upon mixing and stirring for 1 hour, an amorphous precipitate of (NEt<sub>4</sub>)(FeCl<sub>4</sub>) appeared. In this experiment, 1.25 g of (NEt<sub>4</sub>)(FeCl<sub>4</sub>) in the form of yellow powder was isolated after filtration of the amorphous precipitate. The powders were re-crystallized from a tetrahydrofuran (THF) solution at ambient temperature. After 5 days of re-crystallization, greenish-yellow colored crystals of various sizes were obtained. For this particular experiment, a hexagonal pyramid crystal of ~ 4 mm x 4 mm (base dimensions) x 5 mm height was selected for IXS measurement.

**IXS Measurements.** IXS spectra were recorded on a (NEt<sub>4</sub>)(FeCl<sub>4</sub>) single crystal using standard procedures at the SPring-8 high-resolution IXS beamline, BL35-XU<sup>1,2</sup>. The photon flux on the sample was ~10<sup>10</sup> photons/sec in a 0.8 meV bandwidth at 21.75 keV with a spot size of ~0.1 mm diameter (FWHM) from a backscattering (89.8°) Si(11 11 11) monochromator. The scattered radiation was collected by a 2-dimensional array of 12 analyzer crystals. Each analyzer has an independent detector, allowing 12 spectra to be collected simultaneously, and the over-all (analyzer plus monochromator) energy resolution was 1.5 to 1.8 meV (different analyzers behaved differently). The energy scale was determined as discussed in [13] (?) and is expected to be accurate to better than 0.5%. The  $Q$  resolution was 0.48 nm<sup>-1</sup>, where  $Q = 4\pi / \lambda \sin\theta$ ,  $2\theta$  is the scattering angle and  $\lambda$  is the wavelength of x-rays. During the IXS measurements, the sample crystal was maintained at ~27K using a closed cycle He cryostat. The inelastically scattered radiation from each of the 12 analyzers was recorded with a separate CdZnTe detector. For (NEt<sub>4</sub>)(FeCl<sub>4</sub>), the typical total signal count rate on the 380 cm<sup>-1</sup> peak was ~0.2-0.9 cps.

The actual counts in each spectrum are shown below.

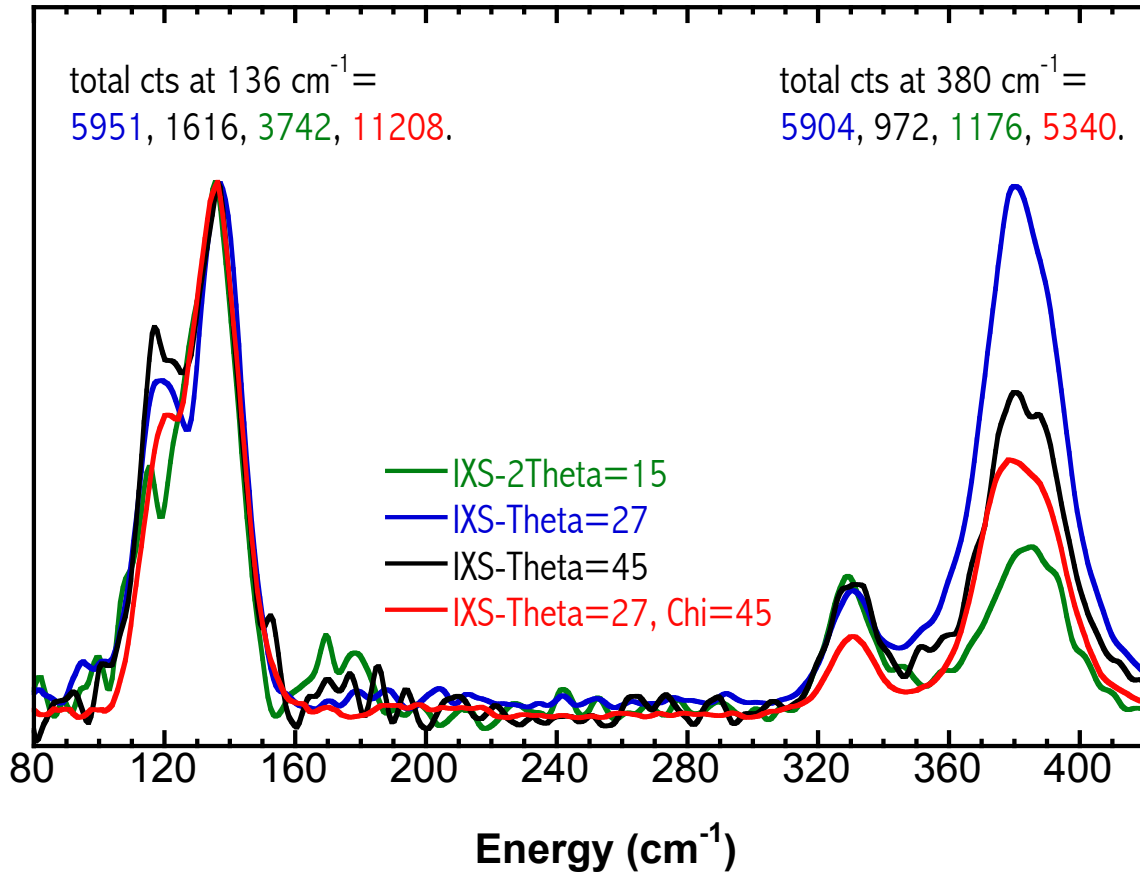

**IXS Data Analysis and Normal Mode Calculations.** The IXS signal was extracted from the raw averaged spectra by subtracting a combination of Lorentzian and Gaussian background lineshape functions. No smoothing was used for any of the spectra. Normal mode calculations were done using a modification of the program Vibratz<sup>3</sup> and a Urey-Bradley force field<sup>4</sup>. The parameters for this force field determine the potential energy  $V$  as previously described<sup>5</sup>. The Vibratz program was used to calculate the relevant phonon polarization eigenvectors (complex phonon polarization) including the Fe and Cl motion in a given normal mode from the normal mode eigenvectors. The calculations used the Evans *et al.*, *Acta Cryst.* 46, 1818 (1990) CSD structure file TABPIV, with a slightly larger force constant for the shorter Fe-Cl bond. To simulate the IXS, Gaussian components were generated at the calculated frequencies, with an amplitude determined by the relative dynamic structure for a particular normal mode and scattering geometry

and a FWHM determined by the  $14 \text{ cm}^{-1}$  instrumental resolution. We note that there are no adjustable scale factors in these simulations.

**X-Ray Crystallography.** The tetrahedral  $[\text{FeCl}_4]^-$  ion was chosen for its extremely simple set of well-studied normal modes, as well as the straightforward arrangement of the  $(\text{FeCl}_4)^-$  ions in the crystal with  $(\text{NEt}_4)^+$  counterions. An additional complication discovered *ex post facto* is that, with flash cooling,  $\text{NEt}_4\text{FeCl}_4$  undergoes a first order phase transition at  $\sim 229 \text{ K}$  that changes the space group from  $P6_3mc$  (Phase I) to  $P31c$  (Phase III). In Phase I there is one Fe in the asymmetric unit and the Fe resides on a site with crystallographic  $3m$  symmetry. In Phase III there are five Fe's in the asymmetric unit, two of which have no crystallographic symmetry and three of which have 3-fold symmetry. As a consequence of the low temperature phase, the structure is not as simple, although the structure bears the same relationship with respect to the  $c$  axis as in the room temperature phase. The most noticeable change is that two of the  $(\text{FeCl}_4)^-$  units are tipped by  $6.7^\circ$  and  $8.0^\circ$ , respectively, with respect to  $c$ . With slow cooling, an intermediate phase is observed (Phase II) both Phase II and Phase III show less disorder in the  $(\text{NEt}_4)^+$  group than in Phase I.

Table S1. Crystal data for three phases of  $(\text{NEt}_4)(\text{FeCl}_4)$

|                        | Phase I <sup>ref [1]</sup> | Phase II <sup>slow cooling</sup> | Phase III <sup>flash cooling</sup> |
|------------------------|----------------------------|----------------------------------|------------------------------------|
| Crystal system         | hexagonal                  | orthorhombic                     | trigonal                           |
| Space group            | $P6_3mc$ (No. 186)         | $Pca2_1$ (No. 29)                | $P31c$ (No. 159)                   |
| $a, \text{Å}$          | 8.198(1)                   | 13.9690(3)                       | 24.3337(9)                         |
| $b, \text{Å}$          |                            | 8.1116(3)                        |                                    |
| $c, \text{Å}$          | 13.183(3)                  | 12.7889(5)                       | 12.8909(5)                         |
| $V, \text{Å}^3$        | 767.3(2)                   | 1449.12(10)                      | 6610.4(6)                          |
| $Z$                    | 2                          | 4                                | 18                                 |
| $T, \text{K}$          | 295(2)                     | 90(2)                            | 90(2)                              |
|                        |                            | 3 component twin                 | inversion twin                     |
| $R_1 [I > 2\sigma(I)]$ | 0.053                      | 0.015                            | 0.031                              |
|                        |                            |                                  |                                    |
|                        |                            |                                  |                                    |
|                        |                            |                                  |                                    |
|                        |                            |                                  |                                    |
|                        |                            |                                  |                                    |

|                                         |                     |                      |                      |
|-----------------------------------------|---------------------|----------------------|----------------------|
| Fe cryst symm, tilt to <i>c</i> axis, ° |                     |                      |                      |
| Fe1                                     | 3m· ( $C_{3v}$ ), 0 | 1 ( <i>CI</i> ), 4.0 | 1 ( <i>CI</i> ), 6.7 |
| Fe2                                     |                     |                      | 1 ( <i>CI</i> ), 8.0 |
| Fe3                                     |                     |                      | 3 ( <i>C3</i> ), 0   |
| Fe4                                     |                     |                      | 3 ( <i>C3</i> ), 0   |
| Fe5                                     |                     |                      | 3 ( <i>C3</i> ), 0   |

[1] Warnke, Z.; Styczeń, E.; Wyrzykowski, D.; Sikorski, A.; Kłak, J.; Mroziński, J. *Struct. Chem.* 2010, 21, 285-289.

1. Baron, A. Q. R., Phonons in Crystals using Inelastic X-Ray Scattering. *Journal of the Spectroscopical Society of Japan* **2009**, 58, (5), 205-214 (Japanese) arXiv 0910.5764 (English).
2. Baron, A. Q. R.; Tanaka, Y.; Goto, S.; Takeshita, K.; Matsushita, T.; Ishikawa, T., An X-ray scattering beamline for studying dynamics. *Journal of Physics and Chemistry of Solids* **2000**, 61, 461-465.
3. Dowty, E., Vibrational interactions of tetrahedra in silicate glasses and crystals: 2. Calculations on melilites, pyroxenes, silica polymorphs and feldspars. *Physics and Chemistry of Minerals* **1987**, 14, 122-138.
4. Simanouti, T., The Normal Vibrations of Polyatomic Molecules as Treated by Urey-Bradley Field. *Journal of Chemical Physics* **1949**, 17, (3), 245-248.
5. Smith, M. C.; Xiao, Y.; Wang, H.; George, S. J.; Coucovanis, D.; Koutmos, M.; Sturhahn, W.; Alp, E. E.; Zhao, J.; Cramer, S. P., Normal Mode Analysis of  $[\text{FeCl}_4]^-$  and  $[\text{Fe}_2\text{S}_2\text{Cl}_4]^{2-}$  via Vibrational Mössbauer, Resonance Raman, and FT-IR Spectroscopy. *Inorganic Chemistry* **2005**, 44, (16), 5562-5570.
